# Supplementary material for: Lamb Meat Quality and Carcass Evaluation of Five Autochthonous Sheep Breeds: Towards Biodiversity Protection
Source: MDPI journal article supplement (doi:10.3390/ani11113222), 2021-11-11
Supplement: s1 [file s1]

**Supplementary Table S1.** Average of the intramuscular fatty acids content (g/100 g fatty acid methyl esters) of *Longissimus lumborum* (LL) and Leg muscles of lambs (means  $\pm$  SE).

| Item      | LL                | Leg               | Effect, <i>p</i> |
|-----------|-------------------|-------------------|------------------|
| C8:0      | 0.034 $\pm$ 0.007 | 0.027 $\pm$ 0.004 | 0.37             |
| C10:0     | 0.283 $\pm$ 0.02  | 0.249 $\pm$ 0.009 | 0.19             |
| C12:0     | 0.492 $\pm$ 0.02  | 0.482 $\pm$ 0.02  | 0.73             |
| C14:0     | 4.308 $\pm$ 0.16  | 4.272 $\pm$ 0.13  | 0.87             |
| C14:1     | 0.327 $\pm$ 0.01  | 0.339 $\pm$ 0.01  | 0.47             |
| C15:0     | 0.469 $\pm$ 0.02  | 0.339 $\pm$ 0.01  | 0.15             |
| C16:0     | 20.486 $\pm$ 0.28 | 19.876 $\pm$ 0.27 | 0.12             |
| C16:1     | 1.369 $\pm$ 0.04  | 1.427 $\pm$ 0.04  | 0.36             |
| C17:0     | 0.693 $\pm$ 0.03  | 0.744 $\pm$ 0.02  | 0.20             |
| C17:1     | 0.533 $\pm$ 0.02  | 0.553 $\pm$ 0.02  | 0.46             |
| C18:0     | 13.829 $\pm$ 0.21 | 13.606 $\pm$ 0.16 | 0.39             |
| C18:1 11t | 5.016 $\pm$ 0.24  | 5.467 $\pm$ 0.19  | 0.15             |
| C18:1 9c  | 30.508 $\pm$ 0.41 | 30.562 $\pm$ 0.37 | 0.93             |
| C18:2 n6  | 8.847 $\pm$ 0.231 | 9.159 $\pm$ 0.408 | 0.65             |
| C18:3 n-6 | 0.325 $\pm$ 0.12  | 0.353 $\pm$ 0.02  | 0.31             |
| C18:3 n-3 | 2.107 $\pm$ 0.16  | 2.315 $\pm$ 0.17  | 0.37             |
| C21:0     | 0.155 $\pm$ 0.02  | 0.194 $\pm$ 0.02  | 0.20             |
| C20:3 n-6 | 0.336 $\pm$ 0.02  | 0.305 $\pm$ 0.01  | 0.26             |
| C20:4 n-6 | 3.939 $\pm$ 0.27  | 3.765 $\pm$ 0.13  | 0.56             |
| C20:5 n-3 | 1.459 $\pm$ 0.12  | 1.510 $\pm$ 0.12  | 0.77             |
| C22:6 n-3 | 0.869 $\pm$ 0.05  | 0.975 $\pm$ 0.07  | 0.21             |
| CLA tot   | 2.360 $\pm$ 0.13  | 2.389 $\pm$ 0.11  | 0.87             |
| SFA       | 44.389 $\pm$ 0.39 | 40.689 $\pm$ 0.34 | 0.18             |
| MUFA      | 37.845 $\pm$ 0.52 | 38.416 $\pm$ 0.33 | 0.36             |
| PUFA      | 20.769 $\pm$ 0.73 | 20.828 $\pm$ 0.56 | 0.95             |

*p*>0.05 not significant, C8:0 = Caprylic acid; C10:0 = Capric acid; C12:0 = Lauric acid; C14:0 = Myristic acid; C14:1 = Myristoleic acid; C15:0 = Pentadecylic acid; C16:0 =Palmitic acid; C16:1 = Palmitoleic acid; C17:0 = Heptadecanoic acid; C17:1 = Heptadecenoic acid; C18:0 = Stearic acid; C18:1 11t = trans-Vaccenic acid; C18:1 9c = Oleic acid; C18:2 n6 = Linoleic acid; C18:3 n-6 = gamma-Linolenic Acid; C18:3 n-3 = alpha-Linolenic Acid; C21:0 = Heneicosanoic acid; C20:3 n-6 = Dihomo-gamma-linolenic acid; C20:4 n-6 = Arachidonic acid; C20:5 n-3 = Eicosapentaenoic Acid; C22:6 n-3 = Docosahexaenoic Acid; CLA tot= Sum of Conjugated linoleic acid (CLA) 9c11t, CLA 10t12c, and CLA 9t11t; SFA= Saturated fatty acids, MUFA= Monounsaturated fatty acids, PUFA = Polyunsaturated fatty acids.
